# Supplementary material for: Expression analysis in intestinal mucosa reveals complex relations among genes under the association peaks in celiac disease
Source: PubMed Central journal article supplement — Eur J Hum Genet. 2014 Nov 12;23(8):1100–5. doi: 10.1038/ejhg.2014.244 (PMC4795102; doi:10.1038/ejhg.2014.244), 2014-11-12
Supplement: ejhg2014244x2.pdf [file ejhg2014244x2.pdf]

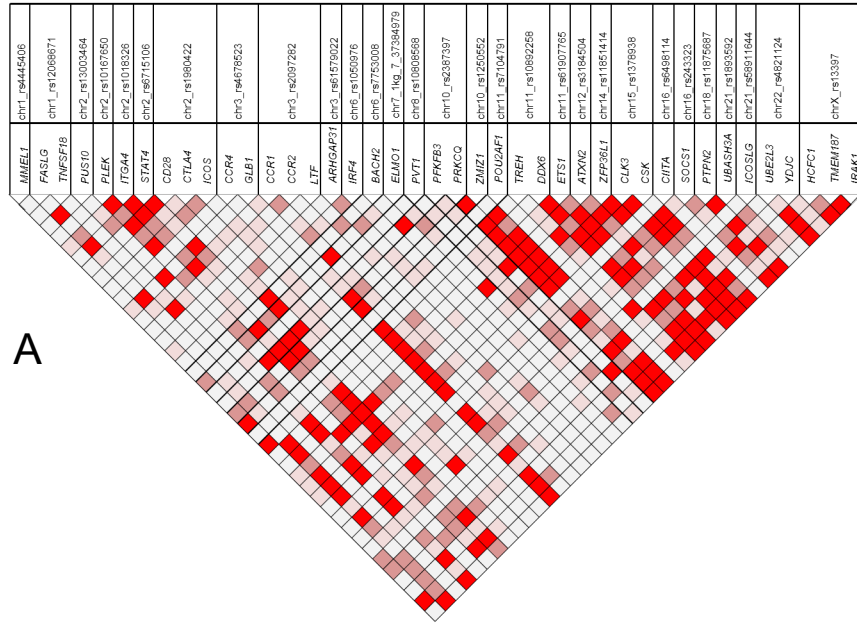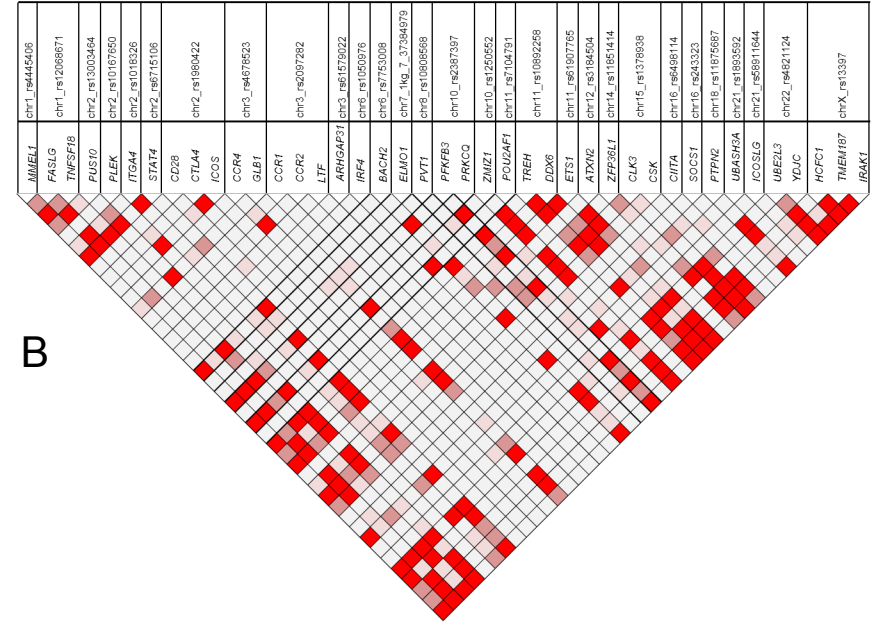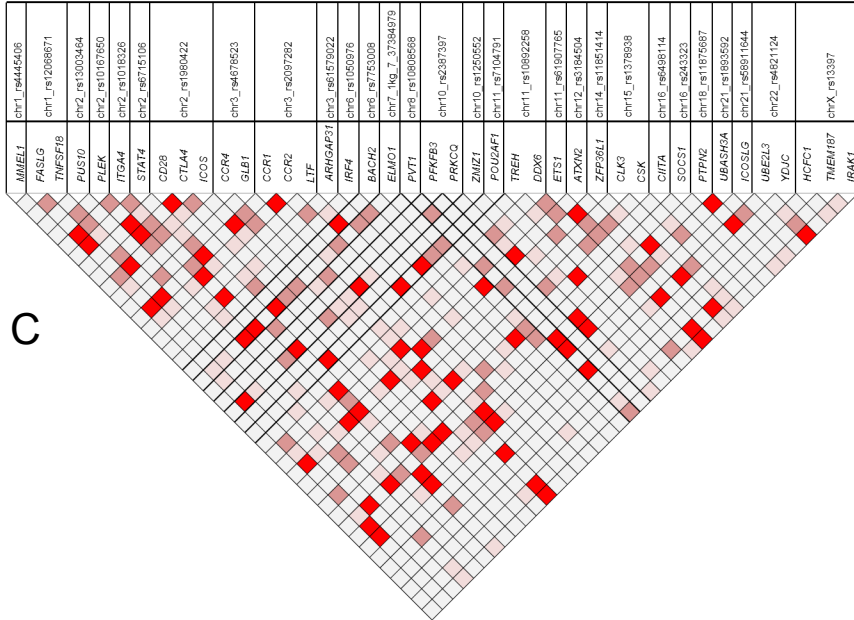

**Supplementary Figure 1:** Gene pair coexpression matrixes for the different disease statuses (A. at diagnosis, B. >2y GFD and C. controls). Each small square represents the p value for the correlation of the expression level in a specific gene pair. Red, dark pink, light pink and white indicate Pearson's correlation p values of  $p < 0.0001$ ,  $p < 0.001$ ,  $p < 0.01$  and  $p > 0.01$  respectively.
